# Supplementary material
Source: PubMed Central journal article supplement (PMC3497359)
Supplement: AEM.02469-12_zam999103866so1.pdf [file AEM.02469-12_zam999103866so1.pdf]

## Supplemental Information

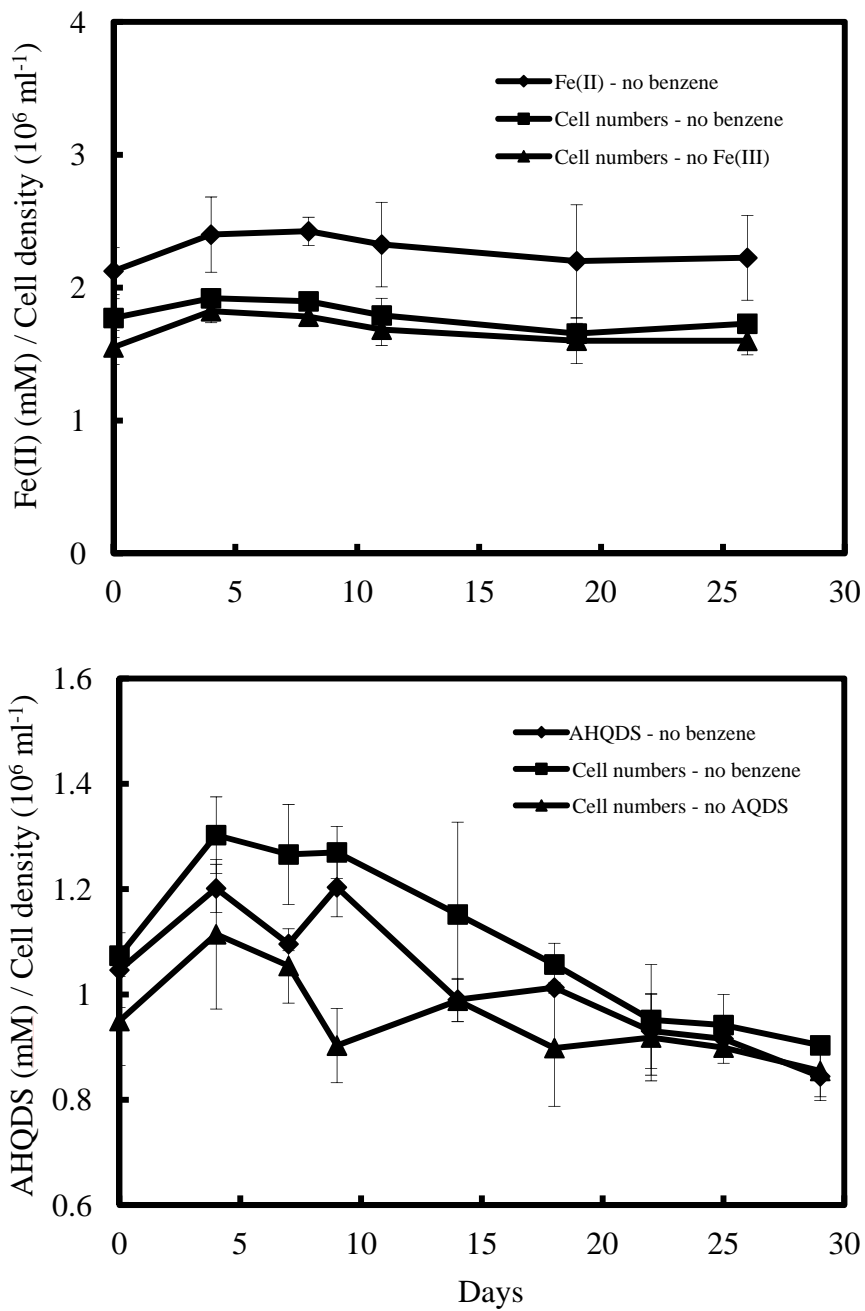

Figure S1. Live cell controls without benzene, Fe(III) oxide (A) or AQDS (B) for benzene oxidation by strain Ben.

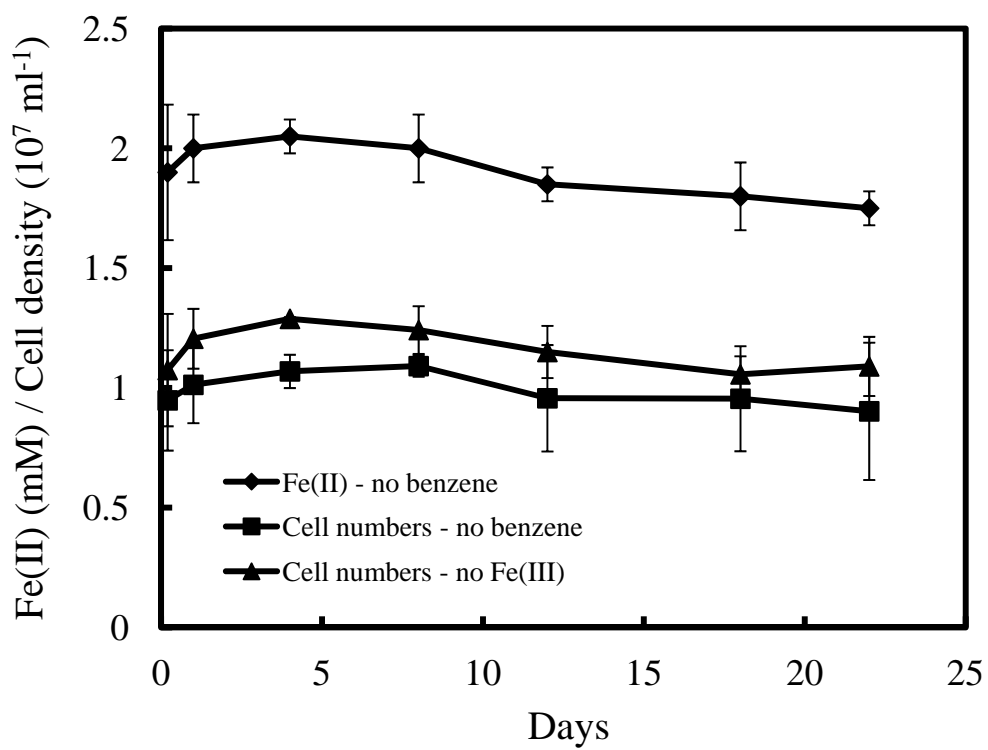

Figure S2. Live cell controls without benzene or ferric citrate for benzene oxidation by *G. metallireducens*.
